# Supplementary material for: Development of an Aus-Derived Nested Association Mapping (Aus-NAM) Population in Rice
Source: MDPI journal article supplement (doi:10.3390/plants10061255), 2021-06-21
Supplement: s1 [file s1]

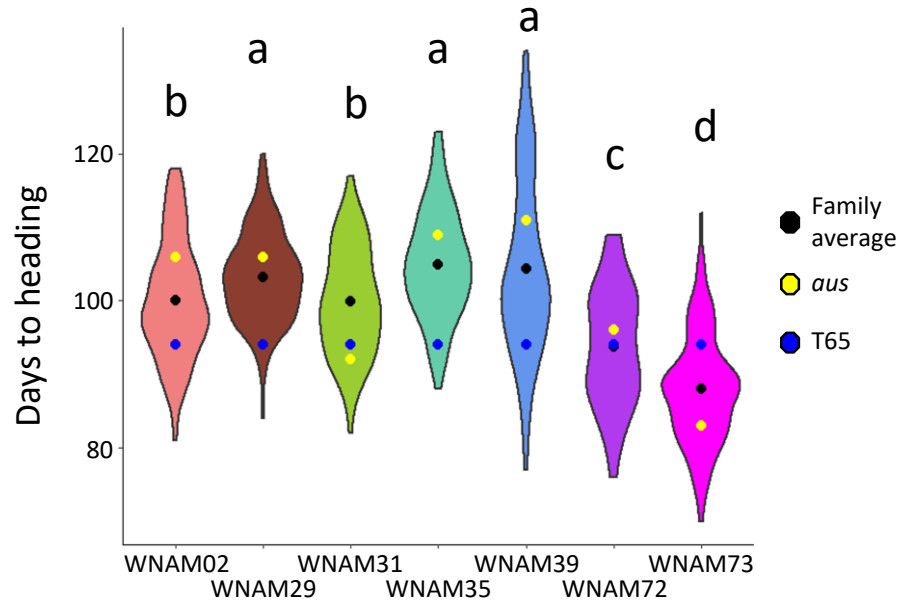

**Figure S1.** Violin plots showing the frequency distributions for days to heading (DTH) in *aus* nested association mapping population. Yellow and blue dots represent the population founders, *aus* and T65 respectively. Black dots show the recombinant inbred lines average in each family. Groups with no significant difference by Tukey HSD with a 95% confidence level are represented by the same letters shown above the plots.

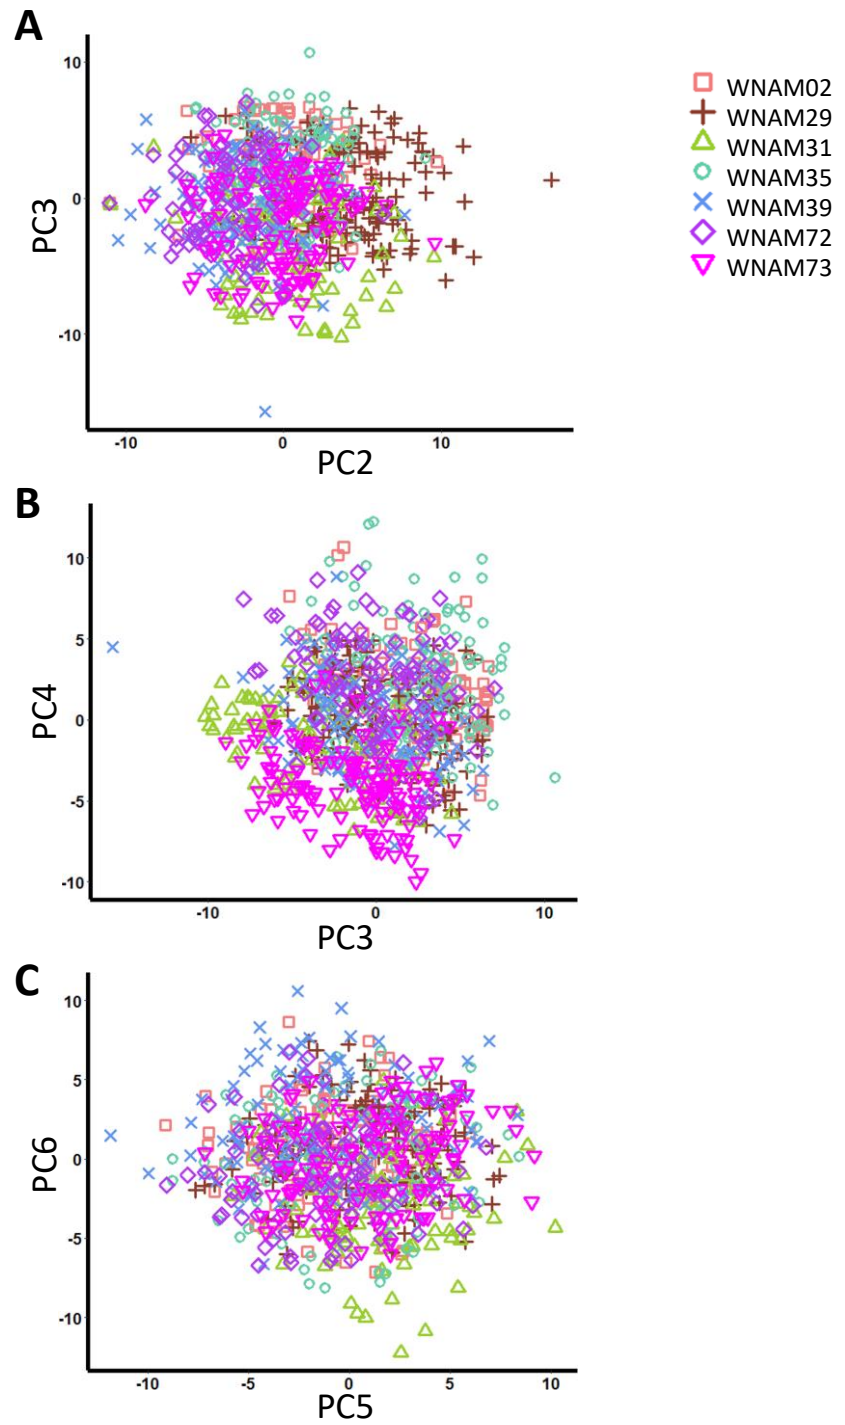

**Figure S2.** Probabilistic principal component analysis (PPCA) showing population structure in *aus* nested association mapping (*aus*-NAM) population. (A) PC2 vs PC3 (B) PC3 vs PC4 (C) PC5 vs PC6. Different shapes and colors represent different *aus*-NAM families.

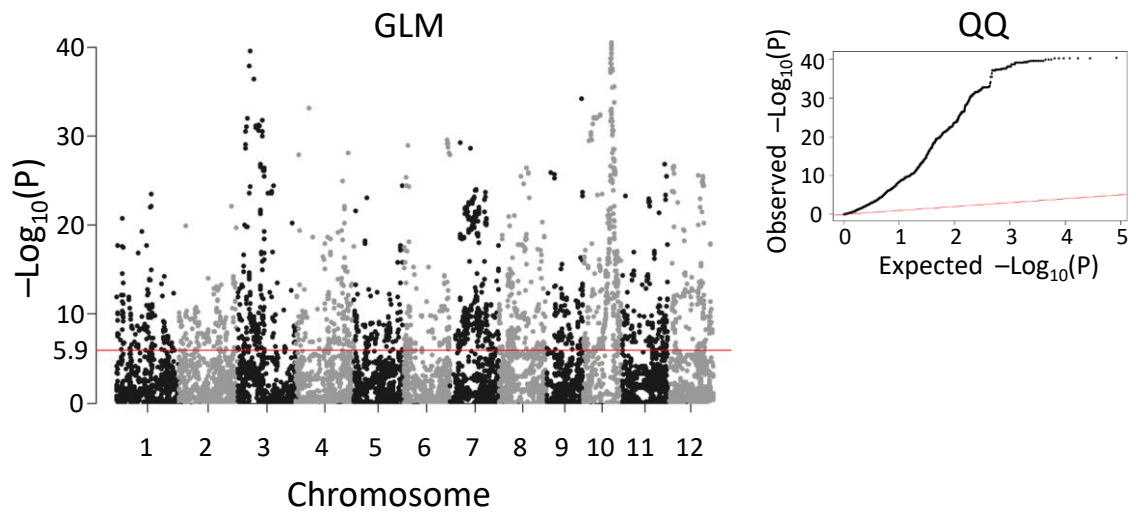

**Figure S3.** Manhattan plot of days to heading using general linear model (GLM). The red horizontal line marks the threshold for genome wide significance (5.9) on a  $-\log_{10}$  scale. A quantile-quantile (QQ) plot is shown in the right panel, where the observed P-values (Y-axis) against the expected P-values (X-axis) under the null hypothesis of no association are plotted on a  $-\log_{10}$  scale. Each black dot indicate a SNP.

|                 |     |                                                               |
|-----------------|-----|---------------------------------------------------------------|
| Reference       | 1   | MNYNFGGNVFDQEVGVGEGGGGGEGSGCPWARPCDGCRAAPSVVYCRADAAYLCASCD    |
| Hd1-Nipnbare    | 1   | MNYNFGGNVFDQEVGVGEGGGGGEGSGCPWARPCDGCRAAPSVVYCRADAAYLCASCD    |
| Hd1_Ginbouzu    | 1   | MNYNFGGNVFDQEVGVGEGGGGGEGSGCPWARPCDGCRAAPSVVYCRADAAYLCASCD    |
| Hd1_WRC39_Badar | 1   | MNYNFGGNVFDQEVGVRGEGGGGGEGSGCPWARPCDGCRAAPSVVYCRADAAYLCASCD   |
| consensus       | 1   | *****.*****ZF-B box*****                                      |
| Reference       | 61  | RVHAANRVASRHERVRVCEACERAPAALACRADAAALCVACDVQVHSAN-----        |
| Hd1-Nipnbare    | 61  | RVHAANRVASRHERVRVCEACERAPAALACRADAAALCVACDVQVHSAN-----        |
| Hd1_Ginbouzu    | 61  | RVHAANRVASRHERVRVCEACERAPAALACRADAAALCVACDVQVYSANPLARRHQRPV   |
| Hd1_WRC39_Badar | 61  | RVHAANRVASRHERVRVCEACERAPAALACRADAAALCVACDVQVHSANPLARRHQRPV   |
| consensus       | 61  | *****.*****ZF-B box*****                                      |
| Reference       | 110 | -PLPAITIPATSVLAEAVVATATVLGDKDEEVDSWLLLSKSDSNNNNNNNNDNDN--ND   |
| Hd1-Nipnbare    | 110 | -PLPAITIPATSVLAEAVVATATVLGDKDEEVDSWLLLSKSDSNNNNNNNNDNDN--ND   |
| Hd1_Ginbouzu    | 121 | APLPAITIPATSVLAEAVVATATVLGDKDEEVDSWLLLSKSDSNNNNNNNNDNDN--ND   |
| Hd1_WRC39_Badar | 121 | APLPAITIPATSVLAEAVVATATVLGDKDEEVDSWLLLSKSDSNNNNNNNNDNDN--ND   |
| consensus       | 121 | .*****.*****                                                  |
| Reference       | 167 | NNNSNSSNNGMYFGEVDEYFDLVGYNsYDNRIENNQDRQYGMHEQQEQQQQQEQMKEF    |
| Hd1-Nipnbare    | 167 | NNNSNSSNNGMYFGEVDEYFDLVGYNsYDNRIENNQDRQYGMHEQQEQQQQQEQMKEF    |
| Hd1_Ginbouzu    | 179 | NNNSNSSNNGMYFGEVDEYFDLVGYNsYDNRIENNQDRQYGMHEQQEQQQQQEQMKEF    |
| Hd1_WRC39_Badar | 181 | NNNSNSSNNGMYFGEVDEYFDLVGYNsYDNRIENNQDRQYGMHEQQEQQQQQEQMKEF    |
| consensus       | 181 | *****.*****                                                   |
| Reference       | 227 | AEKEGSECVVPSQITMLSEQQHSYGyGVVGADQAASMTAGVSAYTDSISNSISFSSMEAGI |
| Hd1-Nipnbare    | 227 | AEKEGSECVVPSQITMLSEQQHSYGyGVVGADQAASMTAGVSAYTDSISNSISFSSMEAGI |
| Hd1_Ginbouzu    | 239 | AEKEGSECVVPSQITMLSEQQHSYGyGVVGADQAASMTAGVSAYTDSISNSISFSSMEAGI |
| Hd1_WRC39_Badar | 241 | AEKEGSECVVPSQITMLSEQQHSYGyGVVGADQAASMTAGVSAYTDSISNRISFSSMEAGI |
| consensus       | 241 | *****.*****                                                   |
| Reference       | 287 | VPDSTVIDMPNSRILTPAGAINLFSGPSLQMSLHFSSMDREARVLRYREKKKARKFEKTI  |
| Hd1-Nipnbare    | 287 | VPDSTVIDMPNSRILTPAGAINLFSGPSLQMSLHFSSMDREARVLRYREKKKARKFEKTI  |
| Hd1_Ginbouzu    | 299 | VPDSTVIDMPNSRILTPAGAINLFSGPSLQMSLHFSSMDREARVLRYREKKKARKFEKTI  |
| Hd1_WRC39_Badar | 301 | VPDSTVIDMPNSRILTPAGAINLFSGPSLQMSLHFSSMDREARVLRYREKKKARKFEKTI  |
| consensus       | 301 | *****.*****CCT motif*****                                     |
| Reference       | 347 | RYETRKAyAEARPRIKGRFAKRSDVQIEVDQMFSTAALSDGSyGTVVPWF            |
| Hd1-Nipnbare    | 347 | RYETRKAyAEARPRIKGRFAKRSDVQIEVDQMFSTAALSDGSyGTVVPWF            |
| Hd1_Ginbouzu    | 359 | RYETRKAyAEARPRIKGRFAKRSDVQIEVDQMFSTAALSDGSyGTVVPWF            |
| Hd1_WRC39_Badar | 361 | RYETRKAyAEARPRIKGRFAKRSDVQIEVDQMFSTAALSDGSyGTVVPWF            |
| consensus       | 361 | *****                                                         |

**Figure S4.** Alignment of amino-acid sequences of *Hd1* in functional alleles of Nipponbare and Ginbouzu, and Badari Dhan (WRC39). The amino acid sequences were deduced from genomic sequences. Regions of the 2 ZF-B box and CCT motif are indicated. The sequence of Badari Dhan contained 6 non-synonymous mutations, but it was considered that the allele retains function.
